# Supplementary material for: Positron emission tomography (PET) for prediction of glioma histology: protocol for an individual-level data meta-analysis of test performance
Source: PubMed Central journal article supplement — BMJ Open. 2018 Feb 17;8(2):e020187. doi: 10.1136/bmjopen-2017-020187 (PMC5855451; doi:10.1136/bmjopen-2017-020187), 2018-02-17
Supplement: bmjopen-2017-020187.draft_revisions.pdf [file bmjopen-2017-020187.draft_revisions.pdf]

# BMJ Open

BMJ Open is committed to open peer review. As part of this commitment we make the peer review history of every article we publish publicly available.

When an article is published we post the peer reviewers' comments and the authors' responses online. We also post the versions of the paper that were used during peer review. These are the versions that the peer review comments apply to.

The versions of the paper that follow are the versions that were submitted during the peer review process. They are not the versions of record or the final published versions. They should not be cited or distributed as the published version of this manuscript.

BMJ Open is an open access journal and the full, final, typeset and author-corrected version of record of the manuscript is available on our site with no access controls, subscription charges or pay-per-view fees (<http://bmjopen.bmj.com>).

If you have any questions on BMJ Open's open peer review process please email [editorial.bmjopen@bmj.com](mailto:editorial.bmjopen@bmj.com)

# BMJ Open

## Positron emission tomography (PET) for prediction of glioma histology: Protocol for an individual-level data meta-analysis of test performance.

|                                 |                                                                                                                                                                                                                                                                                                                                                      |
|---------------------------------|------------------------------------------------------------------------------------------------------------------------------------------------------------------------------------------------------------------------------------------------------------------------------------------------------------------------------------------------------|
| Journal:                        | <i>BMJ Open</i>                                                                                                                                                                                                                                                                                                                                      |
| Manuscript ID                   | bmjopen-2017-020187                                                                                                                                                                                                                                                                                                                                  |
| Article Type:                   | Protocol                                                                                                                                                                                                                                                                                                                                             |
| Date Submitted by the Author:   | 01-Nov-2017                                                                                                                                                                                                                                                                                                                                          |
| Complete List of Authors:       | Trikalinos, Nikolaos; Washington University in St Louis, Internal Medicine<br>Nihashi, Takashi ; Komaki Shimin Byoin, Department of Radiology<br>Evangelou, Evangelos; Dept of Hygiene and Epidemiology<br>Terasawa, Teruhiko; Fujita Hoken Eisei Daigaku Igakubu Daigakuin Igaku<br>Kenkyuka, Department of Emergency and General Internal Medicine |
| <b>Primary Subject Heading</b>: | Oncology                                                                                                                                                                                                                                                                                                                                             |
| Secondary Subject Heading:      | Diagnostics                                                                                                                                                                                                                                                                                                                                          |
| Keywords:                       | glioma, PET, meta-analysis                                                                                                                                                                                                                                                                                                                           |
|                                 |                                                                                                                                                                                                                                                                                                                                                      |

SCHOLARONE™  
Manuscripts

1  
2  
3  
4  
5  
6 1 **Title:** Positron emission tomography (PET) for prediction of glioma histology: Protocol  
7  
8 2 for an individual-level data meta-analysis of test performance.  
9  
10

11  
12 3  
13  
14 4 **Investigators:**

15  
16  
17 5 Nikolaos A. Trikalinos, MD<sup>1</sup>

18  
19  
20 6 Takashi Nihashi, MD, PhD<sup>2</sup>

21  
22  
23 7 Evangelos Evangelou, PhD<sup>3,4</sup>

24  
25  
26 8 Teruhiko Terasawa, MD, PhD<sup>5</sup>

27  
28  
29  
30  
31 10 **Affiliations:**

32  
33  
34 11 1. Department of Oncology, Washington University in St Louis School of Medicine,  
35  
36 12 Missouri, USA

37  
38  
39 13 2. Department of Radiology, Nagoya University Graduate School of Medicine, Nagoya,  
40  
41 14 Japan

42  
43  
44  
45 15 3. Department of Hygiene and Epidemiology, University of Ioannina Medical School,  
46  
47 16 Ioannina, Greece

48  
49  
50  
51 17 4. Department of Epidemiology and Biostatistics, Imperial College London, London,  
52  
53 18 UK

1  
2  
3  
4  
5  
6 19 5. Section of General Internal Medicine, Department of Emergency and General  
7  
8  
9 20 Internal Medicine, Fujita Health University School of Medicine, Toyoake, Aichi,  
10  
11 21 Japan

12  
13  
14 22  
15  
16  
17 23 Address correspondence to:

18  
19  
20 24 Nikolaos Trikalinos , MD

21  
22  
23 25 Division of Oncology

24  
25  
26 26 Washington University in St Louis

27  
28 27 660 S. Euclid Avenue

29  
30  
31 28 Campus Box 8056-29

32  
33  
34 29 St Louis, Missouri 63110

35  
36  
37 30 Phone: 314.747.7955

38  
39  
40 31 FAX: 314.747.5123

41  
42 32 Email: [ntrikalinos@wustl.edu](mailto:ntrikalinos@wustl.edu)

43  
44  
45 33 **Keywords:** Glioma, Positron-Emission Tomography, Network Meta-Analysis

46  
47 34 Word count: 2072 (excluding title page, abstract, references, figures and tables)

1  
2  
3  
4  
5  
6 **Abstract:**  
7

8 **Introduction:** Gliomas, the most commonly diagnosed primary brain tumors, are  
9  
10  
11 associated with varied survivals based, in part, on their histological subtype. Therefore,  
12  
13  
14 accurate pretreatment tumor grading is essential for patient care and clinical trial design.  
15

16  
17 **Methods and Analysis:** We will perform an individual-level data meta-analysis of  
18  
19  
20 published studies to evaluate the ability of different types of PET to differentiate high  
21  
22  
23 from low grade gliomas. **Ethics and Dissemination:** Ethics approval was not  
24  
25  
26 applicable, as this is a meta-analytic study. Results of the analysis will be submitted for  
27  
28  
29 publication in a peer-reviewed journal.  
30

31 Review PROSPERO registration number: 78649  
32  
33

34  
35  
36  
37  
38  
39  
40  
41  
42  
43  
44  
45  
46  
47  
48  
49  
50  
51  
52  
53  
54  
55  
56  
57  
58  
59  
60

47 **Article Summary:**

48 Strengths of this study

- 49 • This is a first of its kind network meta-analysis aiming to establish the  
50 diagnostic accuracy of PET with various tracers for grading of glioma.  
51 Individual treatment meta-analysis with pooling of data can provide more  
52 statistical power to determine differences between imaging modalities.

1  
2  
3  
4  
5  
6 53 Limitations  
7

8  
9 54 • Variability of data obtained from external sources and limited number of  
10  
11 55 patients.

12  
13  
14 56 • Inherent limitations of MTM and IPD-MA for data interpretation / findings  
15  
16  
17 57 might be speculative  
18  
19

20 58

21  
22 59

23  
24  
25 60

26  
27  
28 61

29  
30  
31 62

32  
33  
34 63

35  
36  
37 64

38  
39  
40 65

41  
42  
43 66

44  
45  
46 67

47  
48  
49 68

50  
51  
52 69

53  
54 70  
55  
56  
57  
58  
59  
60

1  
2  
3  
4  
5  
6 **71 Background**

7  
8  
9 72 Gliomas are among the most commonly diagnosed primary brain tumors with an  
10  
11 73 estimated annual incidence of over 20,000 in the United States (SEER projection for  
12  
13  
14 74 2017). Based on clinical, histological and molecular characteristics, gliomas can be  
15  
16  
17 75 broadly divided into two major clinical subcategories: low-grade and high-grade.  
18  
19  
20 76 High-grade gliomas (also called malignant gliomas) are rapidly growing tumors and  
21  
22  
23 77 include glioblastomas (grade IV), anaplastic astrocytomas (grade III), mixed anaplastic  
24  
25  
26 78 oligoastrocytomas (grade III), and anaplastic oligodendrogliomas (grade III). Despite  
27  
28  
29 79 recent advances in multimodality therapies including temozolomide, high-grade gliomas  
30  
31  
32 80 remain incurable with a median survival of less than 3 years for glioblastomas and less  
33  
34  
35 81 than 5 years for anaplastic gliomas (NCCN & ESMO Clinical Practice Guidelines).  
36  
37  
38 82 In contrast, the low-grade gliomas include astrocytomas (grade II), oligodendrogliomas  
39  
40  
41 83 (grade II), and oligoastrocytomas (grade II), and are indolent, with a median survival  
42  
43  
44 84 over 5 years[1]. Treatment of low grade gliomas is evolving and includes maximal  
45  
46  
47 85 tumor resection with the option of radiation and chemotherapy[2].  
48  
49  
50 86 From the above it is evident that accurate pre-therapy histological grading is of  
51  
52  
53 87 paramount importance. In the usual clinical setting, histology is clarified with  
54  
55  
56 88 conventional computed tomography (CT) or magnetic resonance imaging (MRI),  
57  
58  
59  
60

1  
2  
3  
4  
5  
6 89 image-guided biopsy /subtotal surgical resection or near total resection. Unfortunately,  
7  
8  
9 90 apart from complete resection, other approaches are error-prone: Imaging does not  
10  
11 91 provide usable tissue for final diagnosis. Biopsies and partial resections can misguide,  
12  
13  
14 92 as gliomas can demonstrate histological heterogeneity due to histopathological  
15  
16  
17 93 progression; a tumor often has both low- and high-grade components. Unless total  
18  
19  
20 94 surgical resection is performed, histological results depend on which part of the tumor is  
21  
22  
23 95 sampled.

24  
25 96 As much as it is desirable, extensive tumor resection is not always feasible in  
26  
27  
28 97 frail patients or those with tumors located adjacent to critical structures. Therefore, in  
29  
30  
31 98 order to improve tumor grading either noninvasively, or by better, targeted biopsies, one  
32  
33  
34 99 needs to be able to supplement morphological information obtained from conventional  
35  
36  
37 100 imaging with tumor-specific functional information.

38  
39 101 PET is a useful imaging modality that provides additional metabolic  
40  
41  
42 102 information to CT- or MRI-based morphologic characterization of tumors. Its usefulness  
43  
44  
45 103 has been proven in lung cancer[3] and aggressive lymphomas[4]. Several studies have  
46  
47  
48 104 evaluated PET using various tracers such as 18F-FDG, 11C-MET, 18F-FET, and  
49  
50  
51 105 18F-FLT for pre-therapy histological prediction to differentiate high-grade from  
52  
53  
54 106 low-grade glioma, and reported promising results[5-7]. The sample sizes of these



1  
2  
3  
4  
5  
6 107 studies, however, are typically small, resulting in imprecise estimates of diagnostic  
7  
8 108 accuracy and use heterogeneous designs / protocols for PET assessment, making  
9  
10  
11 109 interpretation of the published data difficult. Often, the positivity cutoff criteria are  
12  
13  
14 110 defined *post-hoc* to calculate the best pairs of sensitivity and specificity for each study  
15  
16  
17 111 and lack generalizability. In this situation, aggregate-level data meta-analysis  
18  
19  
20 112 (ALD-MA) typically calculates overestimated summary statistics.  
21  
22  
23 113 A useful approach to the above problem to perform a meta-analysis based on  
24  
25  
26 114 individual-level data (Individual-level data meta-analysis; ILD-MA). This technique  
27  
28  
29 115 employs a predefined uniform cutoff value to estimate test performance measures for all  
30  
31  
32 116 included studies and combines their results. IPD-LD can also evaluate the effect of  
33  
34  
35 117 specific factors on test performance at the level of individual, simultaneously  
36  
37  
38 118 accounting for between-study variations. We therefore planned an ILD-MA to provide a  
39  
40  
41 119 comprehensive overview and quantitative synthesis of information on the test  
42  
43  
44 120 performance of PET for this purpose.  
45  
46  
47

121

## 122 **Methods**

123 This meta-analysis is an extension of a part of a series of systematic reviews on PET in  
124 clinical management of patients with glioma[8][9]. Although these reviews share a

1  
2  
3  
4  
5  
6 125 common literature search until June 2011, each project employs an independent  
7  
8 126 prespecified research protocol with standard systematic review methodologies, and  
9  
10  
11 127 assesses mutually exclusive research objectives. Interim results of an earlier related  
12  
13  
14 128 study of this research project have been presented at an international meeting[10] but  
15  
16  
17 129 never published as full-text.  
18  
19

20 130

### 21 22 23 131 *Literature search*

24  
25 132 We will use our literature database of publications on PET assessed for patients with  
26  
27  
28 133 glioma. We established the database based on the searches of PubMed and Scopus from  
29  
30  
31 134 inception through June 30, 2011 with no language restriction and full-text evaluation of  
32  
33  
34 135 potentially relevant articles found through abstract screening. The complete search  
35  
36  
37 136 strategy and full list of the database is reported elsewhere[9]. We will update the  
38  
39  
40 137 searches until July 30, 2017, and examine the reference lists of eligible studies and  
41  
42  
43 138 relevant review articles.

44  
45 139 One reviewer (TN or NAT) will screen abstracts and at least two of three investigators  
46  
47  
48 140 (TT, NAT, and TT) examine full-text articles of potentially eligible citations.  
49  
50  
51 141 Discrepancies will be resolved by consensus.

### 52 53 54 142 *Inclusion and exclusion criteria*

1  
2  
3  
4  
5  
6 143

7  
8 144 We will select studies that assess PET using 18F-FDG, 11C-MET, 18F-FET, or 18F-FLT  
9  
10  
11 145 for predicting glioma grading, verified with histologic confirmation by surgery or  
12  
13  
14 146 biopsy to be eligible. We have selected these four particular tracers before conducting  
15  
16  
17 147 this research on the basis of an empirical evaluation of published studies of PET on  
18  
19  
20 148 glioma[9] and recently published narrative reviews[11][12]. We will include both  
21  
22  
23 149 prospective and retrospective studies. We will define pathologic confirmation (either by  
24  
25  
26 150 biopsy or surgical resection) as the acceptable reference standard and explicitly exclude  
27  
28  
29 151 studies (or individual patients in a study), in which (or for whom, respectively),  
30  
31  
32 152 pathological confirmation is not performed. We will consider the total surgical resection  
33  
34  
35 153 as the (nearly) perfect reference standard, whereas, (stereotactic) biopsy will be deemed  
36  
37  
38 154 to be the imperfect reference standard. We will include only English language  
39  
40  
41 155 publications that evaluated at least 10 patients for whom PET scanning and  
42  
43  
44 156 histopathological confirmation is successfully performed. We will also exclude  
45  
46  
47 157 editorials, comments, letters to the editor, and review articles. When multiple  
48  
49  
50 158 publications with potentially overlapping patient populations are available, we will only  
51  
52  
53 159 include a publication with the largest sample size.

54 160 We will contact study authors by email if studies do not report adequate  
55  
56  
57  
58  
59  
60

1  
2  
3  
4  
5  
6 161 information on PET and histological results in the participant-level. We will consider  
7  
8  
9 162 our request to be rejected if two email request reminders separately sent q 14 days after  
10  
11  
12 163 the initial contact attempt are rejected. Even in this case, we will allow for the inclusion  
13  
14  
15 164 of a study report in which quantitative data is not reported but the digital extraction (i.e.,  
16  
17 165 data extraction by using a digitizer from its published graphical presentations) is  
18  
19  
20 166 feasible. Otherwise we will exclude these studies. Data will be kept in a shared secure  
21  
22  
23 167 folder accessible by all co-authors.

24  
25  
26 168 ***Data extraction***

27  
28 169 One reviewer (TN or NAT) will extract descriptive data from each eligible study.  
29  
30  
31 170 Another one non-overlapping investigator (TN, NAT, or TT) will verify all the extracted  
32  
33  
34 171 data. We will extract the following published descriptive information from eligible  
35  
36  
37 172 studies: first author, year of publication, journal, patient demographics and clinical  
38  
39  
40 173 characteristics, therapeutic interventions in the case of post-therapy or recurrence  
41  
42  
43 174 assessment, technical specifications of PET, and interpretation of PET results.

44  
45 175

46  
47  
48 176 One reviewer (TN, or NAT) will extract published quantitative data regarding imaging  
49  
50  
51 177 results (i.e., visual assessment and quantitative assessment such as standard uptake  
52  
53  
54 178 values (SUVs) or tumor-to-normal uptake ratio (T/N ratio)) and final diagnoses (i.e.,

1  
2  
3  
4  
5  
6 179 histopathologic subtype and grading) at the individual level. Another one reviewer (TT)  
7  
8  
9 180 will verify all the data. We will exclude any cases in which PET scanning is  
10  
11 181 unsuccessful (and thus results are arbitrary imputed *post-hoc*). We will also exclude any  
12  
13  
14 182 cases in which alternative reference standards such as clinical follow-up instead of  
15  
16  
17 183 pathological confirmation is used to determine histologic grading.  
18  
19  
20 184 If reported, we will also extract the following individual-level variables as the candidate  
21  
22 185 effect-modifiers to be evaluated in meta-regression: age, sex, clinical scenario (i.e.,  
23  
24  
25 186 primary diagnosis vs. post-therapy/recurrence assessment), and tissue sampling methods  
26  
27  
28 187 (i.e, how the pathological specimens are obtained, either biopsy, partial or total  
29  
30  
31 188 resection)

32  
33  
34 189

35  
36  
37 190 ***Assessment of risk of bias.***

38  
39  
40 191 To assess the risk of bias and applicability of each study, two reviewers (TN, NAT) will  
41  
42 192 independently assess patient selection, index test, reference standard, and their flow and  
43  
44  
45 193 timing based on the revised Quality Assessment of Diagnostic Accuracy Studies  
46  
47  
48 194 (QUADAS-2). Discrepant ratings will be resolved by consensus. The complete list of  
49  
50  
51 195 operational definitions to rate each item is available from the authors upon request.

52  
53  
54 196

1  
2  
3  
4  
5  
6 197 ***Data synthesis***  
7

8  
9 198 We will use a bivariate model to obtain an estimate of the summary sensitivity and  
10  
11 199 specificity with their corresponding confidence intervals (CIs). We will fit a two-level a  
12  
13  
14 200 generalized mixed regression model conditional on the sensitivity and specificity of  
15  
16  
17 201 each study and a bivariate normal model for the sensitivity and specificity between  
18  
19  
20 202 studies [13](Reitsma et al, 2005 Journal of Clinical Epidemiology; Chu H and Cole SR,  
21  
22 203 2006, Journal of Clinical Epidemiology). We will calculate summary positive and  
23  
24  
25 204 negative likelihood ratios based on the summary sensitivity and specificity estimates.  
26  
27  
28 205 Positive likelihood ratio (LR+) is the ratio of sensitivity over (1-specificity) whereas  
29  
30  
31 206 negative likelihood ratio (LR-) is defined as the ratio of (1-sensitivity) over specificity.  
32  
33  
34 207 The discriminating ability of a diagnostic test is better with higher LR+ and lower LR-.  
35  
36  
37 208 A good diagnostic test typically has LR+ >5.0 and LR- <0.2. We will also construct a  
38  
39  
40 209 hierarchical summary receiver operating characteristic curve (HSROC) based on the  
41  
42  
43 210 parameters of the fitted model (Rutter Cm and Gatsonis CA, 2001; Statistics in  
44  
45  
46 211 Medicine; Macaskill P, 2004; Journal of Clinical Epidemiology). We will assess  
47  
48  
49 212 between-study heterogeneity visually using forest plots, and also by plotting sensitivity  
50  
51  
52 213 and specificity in the ROC space. We will construct 95% credible regions for summary  
53  
54  
55 214 sensitivity and specificity from the estimated parameters as proposed[14].  
56  
57  
58  
59  
60

1  
2  
3  
4  
5  
6 215

7  
8  
9 216 ***Subgroup analysis and meta-regression***

10  
11 217 To explore heterogeneity, we will perform subgroup analyses and if feasible, the  
12  
13  
14 218 statistical differences among mutually exclusive subgroups will be assessed by  
15  
16  
17 219 univariable meta-regression. We will add a candidate modifier (as either 0 [absence] or  
18  
19  
20 220 1 [presence]) to the test performance parameters (i.e., sensitivity and specificity  
21  
22  
23 221 parameters, or diagnostic odds ratio and threshold parameters, respectively) jointly in  
24  
25  
26 222 the bivariate random-effects model or binormal random-effects model, respectively.  
27  
28 223 We will record: publication year, study design (i.e., prospective versus retrospective) as  
29  
30  
31 224 the study-level covariates, age, sex, clinical scenario (i.e., primary diagnosis vs.  
32  
33  
34 225 post-therapy/recurrence assessment) and tissue sampling methods (i.e., biopsy vs.  
35  
36  
37 226 partial or subtotal resection vs. total resection).

38  
39  
40 227

41  
42 228 ***Comparisons among different PET methodologies***

43  
44  
45 229 We will compare the test performance among alternative PET tracers, and also those  
46  
47  
48 230 based on different imaging assessment protocols (i.e., visual assessment vs. quantitative  
49  
50  
51 231 assessment, either T/N ratios or SUVs). Regarding the T/N ratios, we will operationally  
52  
53  
54 232 define three categories based on the specified referent tissues: mean or median uptakes  
55  
56  
57  
58  
59  
60

1  
2  
3  
4  
5  
6 233 in the gray matter (GM), those in the white matter (WM), and other miscellaneous  
7  
8  
9 234 methods (MISC) including mean or median uptakes in the contra-lateral corresponding  
10  
11 235 anatomical sites or those in the adjacent normal tissue regardless of GM or WM.  
12  
13

14 236 For indirect comparisons, we will visually compare the constructed summary  
15  
16  
17 237 ROC curves and the credible regions of sensitivity and specificity. We will also  
18  
19  
20 238 statistically assess the differences by univariable meta-regression using the tracers or  
21  
22 239 assessment methods as the covariate being incorporated into the meta-analytic model.  
23  
24  
25 240 These results however, need to be interpreted carefully because findings from the  
26  
27  
28 241 indirect comparisons may be only speculative[15]. To tackle this issue, we will also  
29  
30  
31 242 perform these analyses limiting only to comparative studies that assess multiple tracers  
32  
33  
34 243 or methods for the same participants, from which direct comparisons can be performed.  
35  
36

37 244 We will conduct all analyses using STATA, version 14/SE (Stata Corp, College  
38  
39 245 Station, TX), and OpenBUGS, version 3.2.3 (members of OpenBUGS Project  
40  
41  
42 246 Management Group; see [www.openbugs.net](http://www.openbugs.net)). All tests will be two-sided and statistical  
43  
44  
45 247 significance will be defined as a  $p$ -value  $< .05$ .  
46  
47

## 48 248 **Discussion**

49

50  
51 249 Differentiating high from low grade malignancies has significant prognostic  
52  
53  
54 250 information for a variety of tumors; gliomas are not an exception. While an optimally  
55  
56  
57  
58  
59  
60



1  
2  
3  
4  
5  
6 251 resected biopsy specimen is always preferable to indirect evidence, imaging can provide  
7  
8  
9 252 helpful adjunct information. Moreover, functional imaging, such as positron emission  
10  
11  
12 253 tomography with select biotracers has the potential to become a powerful tool in  
13  
14  
15 254 assessment of patients and influence treatment decisions. By conducting a multiple  
16  
17  
18 255 treatment meta- analysis and IPD meta-analysis, this study hopes to clarify the  
19  
20  
21 256 diagnostic accuracy of PET/CT with various tracers in differentiating glioma histology  
22  
23  
24 257 and establish thresholds, upon which further studies can be performed.

25  
26 258 **Contributorship statement:** Abstract screening: TN and NAT. Full-text article  
27  
28  
29 259 examination: TT, NAT, and TT. Data extraction: TN, TT and NAT. Assessment of the  
30  
31  
32 260 risk of bias and applicability of each study: TN and NAT. Statistical analysis: TT and  
33  
34  
35 261 EE. All authors (TN,TT,EE,NAT) have equally contributed to the final version of the  
36  
37  
38 262 protocol, have reviewed and have approved of it.

39  
40 263 **Competing interests:** None declared.

41  
42  
43 264 **Funding:** his research received no specific grant from any funding agency in the public,  
44  
45  
46 265 commercial or not-for-profit sectors.

47  
48  
49 266 **Data sharing statement:** Supplementary and raw data can be provided by the authors  
50  
51  
52 267 freely upon request.

53  
54 268 **Provenance and peer review:** Not commissioned; externally peer reviewed.  
55  
56  
57  
58  
59  
60

1  
2  
3  
4  
5  
6 269  
7  
8

9 270  
10  
11

12 271  
13

14 272 **References:**  
15

16  
17 273 1. Claus EB, Walsh KM, Wiencke JK, Molinaro AM, Wiemels JL, Schildkraut JM,  
18

19  
20 274 Bondy ML, Berger M, Jenkins R, Wrensch M: **Survival and low-grade glioma:**  
21

22  
23 275 **the emergence of genetic information.** *Neurosurg Focus* 2015, **38**(1):E6.  
24

25 276 2. Buckner JC, Shaw EG, Pugh SL, Chakravarti A, Gilbert MR, Barger GR, Coons  
26

27  
28 277 S, Ricci P, Bullard D, Brown PD *et al*: **Radiation plus Procarbazine, CCNU,**  
29

30  
31 278 **and Vincristine in Low-Grade Glioma.** *N Engl J Med* 2016,  
32

33  
34 279 **374**(14):1344-1355.  
35

36  
37 280 3. Sheikhabaei S, Mena E, Yanamadala A, Reddy S, Solnes LB, Wachsmann J,  
38

39  
40 281 Subramaniam RM: **The Value of FDG PET/CT in Treatment Response**  
41

42  
43 282 **Assessment, Follow-Up, and Surveillance of Lung Cancer.** *AJR Am J*  
44

45 283 *Roentgenol* 2017, **208**(2):420-433.  
46

47  
48 284 4. Adams HJ, Kwee TC: **Pretransplant FDG-PET in aggressive non-Hodgkin**  
49

50  
51 285 **lymphoma: systematic review and meta-analysis.** *Eur J Haematol* 2017,  
52

53  
54 286 **98**(4):337-347.  
55  
56  
57  
58  
59

- 1  
2  
3  
4  
5  
6 287 5. Miyake K, Shinomiya A, Okada M, Hatakeyama T, Kawai N, Tamiya T:  
7  
8  
9 288 **Usefulness of FDG, MET and FLT-PET studies for the management of**  
10  
11 289 **human gliomas.** *J Biomed Biotechnol* 2012, **2012**:205818.
- 12  
13  
14 290 6. Sweeney R, Polat B, Samnick S, Reiners C, Flentje M, Verburg FA:  
15  
16  
17 291 **O-(2-[(18F)fluoroethyl]-L-tyrosine uptake is an independent prognostic**  
18  
19  
20 292 **determinant in patients with glioma referred for radiation therapy.** *Ann*  
21  
22 293 *Nucl Med* 2014, **28**(2):154-162.
- 23  
24  
25 294 7. Thon N, Kunz M, Lemke L, Jansen NL, Eigenbrod S, Kreth S, Lutz J,  
26  
27  
28 295 Egensperger R, Giese A, Herms J *et al*: **Dynamic 18F-FET PET in suspected**  
29  
30  
31 296 **WHO grade II gliomas defines distinct biological subgroups with different**  
32  
33  
34 297 **clinical courses.** *Int J Cancer* 2015, **136**(9):2132-2145.
- 35  
36  
37 298 8. Nishashi T, Dahabreh IJ, Terasawa T: **Diagnostic accuracy of PET for**  
38  
39  
40 299 **recurrent glioma diagnosis: a meta-analysis.** *AJNR Am J Neuroradiol* 2013,  
41  
42 300 **34**(5):944-950, S941-911.
- 43  
44  
45 301 9. Nishashi T, Dahabreh IJ, Terasawa T: **PET in the clinical management of**  
46  
47  
48 302 **glioma: evidence map.** *AJR Am J Roentgenol* 2013, **200**(6):W654-660.
- 49  
50  
51 303 10. Nishashi T, Terasawa T.: **Positron Emission Tomography (PET) to**  
52  
53  
54 304 **Differentiate High-Grade from Low-Grade Glioma: A Meta-Analysis of**

- 1  
2  
3  
4  
5  
6 305        **Test Performance.** *J Neuroimaging* 2014, **23**(2):280 (Abstract)  
7  
8  
9 306 .  
10  
11 307    11.    la Fougere C, Suchorska B, Bartenstein P, Kreth FW, Tonn JC: **Molecular**  
12  
13  
14 308        **imaging of gliomas with PET: opportunities and limitations.** *Neuro Oncol*  
15  
16  
17 309        2011, **13**(8):806-819.  
18  
19  
20 310    12.    Boellaard R: **Need for standardization of 18F-FDG PET/CT for treatment**  
21  
22  
23 311        **response assessments.** *J Nucl Med* 2011, **52 Suppl 2**:93S-100S.  
24  
25  
26 312    13.    Riley RD, Dodd SR, Craig JV, Thompson JR, Williamson PR: **Meta-analysis of**  
27  
28 313        **diagnostic test studies using individual patient data and aggregate data.** *Stat*  
29  
30  
31 314        *Med* 2008, **27**(29):6111-6136.  
32  
33  
34 315    14.    Harbord RM, Deeks JJ, Egger M, Whiting P, Sterne JA: **A unification of**  
35  
36  
37 316        **models for meta-analysis of diagnostic accuracy studies.** *Biostatistics* 2007,  
38  
39  
40 317        **8**(2):239-251.  
41  
42  
43 318    15.    Takwoingi Y, Leeflang MM, Deeks JJ: **Empirical evidence of the importance**  
44  
45  
46 319        **of comparative studies of diagnostic test accuracy.** *Ann Intern Med* 2013,  
47  
48 320        **158**(7):544-554.  
49  
50  
51 321

1  
2  
3  
4  
5  
6  
7  
8  
9  
10  
11  
12  
13  
14  
15  
16  
17  
18  
19  
20  
21  
22  
23  
24  
25  
26  
27  
28  
29  
30  
31  
32  
33  
34  
35  
36  
37  
38  
39  
40  
41  
42  
43  
44  
45  
46  
47

**PRISMA-P (Preferred Reporting Items for Systematic review and Meta-Analysis Protocols) 2015 checklist: recommended items to address in a systematic review protocol\***

| Section and topic                 | Item No          | Checklist item                                                                                                                                                                                                                |
|-----------------------------------|------------------|-------------------------------------------------------------------------------------------------------------------------------------------------------------------------------------------------------------------------------|
| <b>ADMINISTRATIVE INFORMATION</b> |                  |                                                                                                                                                                                                                               |
| Title:                            |                  |                                                                                                                                                                                                                               |
| Identification                    | 1a Line1         | Identify the report as a protocol of a systematic review.                                                                                                                                                                     |
| Update                            | 1b Line 123      | If the protocol is for an update of a previous systematic review, identify as such                                                                                                                                            |
| Registration                      | 2 Line 44        | If registered, provide the name of the registry (such as PROSPERO) and registration number                                                                                                                                    |
| Authors:                          |                  |                                                                                                                                                                                                                               |
| Contact                           | 3a Line 23       | Provide name, institutional affiliation, e-mail address of all protocol authors; provide physical mailing address of corresponding author                                                                                     |
| Contributions                     | 3b Line 258      | Describe contributions of protocol authors and identify the guarantor of the review                                                                                                                                           |
| Amendments                        | 4 Not applicable | If the protocol represents an amendment of a previously completed or published protocol, identify as such and list changes; otherwise, state plan for documenting important protocol amendments                               |
| Support:                          |                  |                                                                                                                                                                                                                               |
| Sources                           | 5a Line 264      | Indicate sources of financial or other support for the review                                                                                                                                                                 |
| Sponsor                           | 5b N/A           | Provide name for the review funder and/or sponsor                                                                                                                                                                             |
| Role of sponsor or funder         | 5c N/A           | Describe roles of funder(s), sponsor(s), and/or institution(s), if any, in developing the protocol                                                                                                                            |
| <b>INTRODUCTION</b>               |                  |                                                                                                                                                                                                                               |
| Rationale                         | 6 Line 72        | Describe the rationale for the review in the context of what is already known                                                                                                                                                 |
| Objectives                        | 7 Line 118       | Provide an explicit statement of the question(s) the review will address with reference to participants, interventions, comparators, and outcomes (PICO)                                                                      |
| <b>METHODS</b>                    |                  |                                                                                                                                                                                                                               |
| Eligibility criteria              | 8 Line 132       | Specify the study characteristics (such as PICO, study design, setting, time frame) and report characteristics (such as years considered, language, publication status) to be used as criteria for eligibility for the review |
| Information sources               | 9 Line 133       | Describe all intended information sources (such as electronic databases, contact with study authors, trial registers or other grey literature sources) with planned dates of coverage                                         |
| Search strategy                   | 10 Line 135      | Present draft of search strategy to be used for at least one electronic database, including planned limits, such that it could be repeated                                                                                    |
| Study records:                    |                  |                                                                                                                                                                                                                               |

|                                    |                                                     |                                                                                                                                                                                                                                                                                                                                                                                                                                                                                                                                |
|------------------------------------|-----------------------------------------------------|--------------------------------------------------------------------------------------------------------------------------------------------------------------------------------------------------------------------------------------------------------------------------------------------------------------------------------------------------------------------------------------------------------------------------------------------------------------------------------------------------------------------------------|
| Data management                    | 11a Line 166                                        | Describe the mechanism(s) that will be used to manage records and data throughout the review                                                                                                                                                                                                                                                                                                                                                                                                                                   |
| Selection process                  | 11b Line 144                                        | State the process that will be used for selecting studies (such as two independent reviewers) through each phase of the review (that is, screening, eligibility and inclusion in meta-analysis)                                                                                                                                                                                                                                                                                                                                |
| Data collection process            | 11c Line 169                                        | Describe planned method of extracting data from reports (such as piloting forms, done independently, in duplicate), any processes for obtaining and confirming data from investigators                                                                                                                                                                                                                                                                                                                                         |
| Data items                         | 12 Line 171                                         | List and define all variables for which data will be sought (such as PICO items, funding sources), any pre-planned data assumptions and simplifications                                                                                                                                                                                                                                                                                                                                                                        |
| Outcomes and prioritization        | 13 Line 176                                         | List and define all outcomes for which data will be sought, including prioritization of main and additional outcomes, with rationale                                                                                                                                                                                                                                                                                                                                                                                           |
| Risk of bias in individual studies | 14 Line 190                                         | Describe anticipated methods for assessing risk of bias of individual studies, including whether this will be done at the outcome or study level, or both; state how this information will be used in data synthesis                                                                                                                                                                                                                                                                                                           |
| Data synthesis                     | 15a Line 205<br>15b Line 198<br>15c Line 216<br>15d | Describe criteria under which study data will be quantitatively synthesised<br>If data are appropriate for quantitative synthesis, describe planned summary measures, methods of handling data and methods of combining data from studies, including any planned exploration of consistency (such as $I^2$ , Kendall's $\tau$ )<br>Describe any proposed additional analyses (such as sensitivity or subgroup analyses, meta-regression)<br>If quantitative synthesis is not appropriate, describe the type of summary planned |
| Meta-bias(es)                      | 16 Line 191                                         | Specify any planned assessment of meta-bias(es) (such as publication bias across studies, selective reporting within studies)                                                                                                                                                                                                                                                                                                                                                                                                  |
| Confidence in cumulative evidence  | 17 Line 211 and 217                                 | Describe how the strength of the body of evidence will be assessed (such as GRADE)                                                                                                                                                                                                                                                                                                                                                                                                                                             |

**\* It is strongly recommended that this checklist be read in conjunction with the PRISMA-P Explanation and Elaboration (cite when available) for important clarification on the items. Amendments to a review protocol should be tracked and dated. The copyright for PRISMA-P (including checklist) is held by the PRISMA-P Group and is distributed under a Creative Commons Attribution Licence 4.0.**

*From: Shamseer L, Moher D, Clarke M, Ghersi D, Liberati A, Petticrew M, Shekelle P, Stewart L, PRISMA-P Group. Preferred reporting items for systematic review and meta-analysis protocols (PRISMA-P) 2015: elaboration and explanation. BMJ. 2015 Jan 2;349(jan02 1):g7647.*

# BMJ Open

## Positron emission tomography (PET) for prediction of glioma histology: Protocol for an individual-level data meta-analysis of test performance.

|                                 |                                                                                                                                                                                                                                                                                                                                                      |
|---------------------------------|------------------------------------------------------------------------------------------------------------------------------------------------------------------------------------------------------------------------------------------------------------------------------------------------------------------------------------------------------|
| Journal:                        | <i>BMJ Open</i>                                                                                                                                                                                                                                                                                                                                      |
| Manuscript ID                   | bmjopen-2017-020187.R1                                                                                                                                                                                                                                                                                                                               |
| Article Type:                   | Protocol                                                                                                                                                                                                                                                                                                                                             |
| Date Submitted by the Author:   | 27-Dec-2017                                                                                                                                                                                                                                                                                                                                          |
| Complete List of Authors:       | Trikalinos, Nikolaos; Washington University in St Louis, Internal Medicine<br>Nihashi, Takashi ; Komaki Shimin Byoin, Department of Radiology<br>Evangelou, Evangelos; Dept of Hygiene and Epidemiology<br>Terasawa, Teruhiko; Fujita Hoken Eisei Daigaku Igakubu Daigakuin Igaku<br>Kenkyuka, Department of Emergency and General Internal Medicine |
| <b>Primary Subject Heading</b>: | Oncology                                                                                                                                                                                                                                                                                                                                             |
| Secondary Subject Heading:      | Diagnostics                                                                                                                                                                                                                                                                                                                                          |
| Keywords:                       | glioma, PET, meta-analysis                                                                                                                                                                                                                                                                                                                           |
|                                 |                                                                                                                                                                                                                                                                                                                                                      |

SCHOLARONE™  
Manuscripts

1  
2  
3  
4  
5  
6 1 **Title:** Positron emission tomography (PET) for prediction of glioma histology: Protocol  
7  
8 2 for an individual-level data meta-analysis of test performance.  
9  
10

11  
12 3  
13  
14 4 **Investigators:**

15  
16  
17 5 Nikolaos A. Trikalinos, MD<sup>1</sup>

18  
19  
20 6 Takashi Nihashi, MD, PhD<sup>2</sup>

21  
22  
23 7 Evangelos Evangelou, PhD<sup>3,4</sup>

24  
25  
26 8 Teruhiko Terasawa, MD, PhD<sup>5</sup>

27  
28  
29  
30  
31 10 **Affiliations:**

32  
33  
34 11 1. Department of Oncology, Washington University in St Louis School of Medicine,  
35  
36 12 Missouri, USA

37  
38  
39 13 2. Department of Radiology, Nagoya University Graduate School of Medicine, Nagoya,  
40  
41 14 Japan

42  
43  
44  
45 15 3. Department of Hygiene and Epidemiology, University of Ioannina Medical School,  
46  
47 16 Ioannina, Greece

48  
49  
50  
51 17 4. Department of Epidemiology and Biostatistics, Imperial College London, London,  
52  
53 18 UK



1  
2  
3  
4  
5  
6 19 5. Section of General Internal Medicine, Department of Emergency and General  
7  
8  
9 20 Internal Medicine, Fujita Health University School of Medicine, Toyoake, Aichi,  
10  
11 21 Japan

12  
13  
14  
15  
16  
17 23 Address correspondence to:

18  
19  
20 24 Nikolaos Trikalinos , MD

21  
22 25 Division of Oncology

23  
24  
25 26 Washington University in St Louis

26  
27 27 660 S. Euclid Avenue

28  
29  
30 31 Campus Box 8056-29

31  
32 32 St Louis, Missouri 63110

33  
34  
35 36 30 Phone: 314.747.7955

36  
37  
38 39 31 FAX: 314.747.5123

38  
39  
40 41 32 Email: [ntrikalinos@wustl.edu](mailto:ntrikalinos@wustl.edu)

41  
42  
43 44 33 **Keywords:** Glioma, Positron-Emission Tomography, Network Meta-Analysis

44  
45  
46 47 34 Word count: 2072 (excluding title page, abstract, references, figures and tables)

1  
2  
3  
4  
5  
6 35 **Abstract:**

7  
8 36 **Introduction:** Gliomas, the most commonly diagnosed primary brain tumors, are  
9  
10  
11 37 associated with varied survivals based, in part, on their histological subtype. Therefore,  
12  
13  
14 38 accurate pretreatment tumor grading is essential for patient care and clinical trial design.  
15  
16

17 39 **Methods and Analysis:** We will perform an individual-level data meta-analysis of  
18  
19  
20 40 published studies to evaluate the ability of different types of PET to differentiate high  
21  
22  
23 41 from low grade gliomas. We will search PubMed and Scopus from inception through  
24  
25  
26 42 July 30, 2017 with no language restriction and full-text evaluation of potentially  
27  
28  
29 43 relevant articles. We will choose studies that assess PET using 18F-FDG, 11C-MET,  
30  
31 44 18F-FET, or 18F-FLT for grading, verified with histologic confirmation. We will  
32  
33  
34 45 include both prospective and retrospective studies. Bias will be assessed by two  
35  
36  
37 46 reviewers with the QUADAS-2 tool and as per method described by Deeks et al. **Ethics**  
38  
39  
40 47 **and Dissemination:** Ethics approval was not applicable, as this is a meta-analytic study.  
41  
42  
43 48 Results of the analysis will be submitted for publication in a peer-reviewed journal.  
44

45 49 PROSPERO registration number: CRD42017078649  
46  
47

48 50  
49  
50

51 51  
52  
53

54 52  
55  
56  
57  
58  
59  
60

1  
2  
3  
4  
5  
6 **53 Article Summary:**  
7

8  
9 **54 Strengths of this study**

- 10  
11 • 55 This is a first of its kind network meta-analysis aiming to establish the  
12  
13  
14 56 diagnostic accuracy of PET with various tracers for grading of glioma.  
15  
16  
17 57 Individual treatment meta-analysis with pooling of data can provide more  
18  
19  
20 58 statistical power to determine differences between imaging modalities.  
21

22  
23 **59 Limitations**

- 24  
25 • 60 Variability of data obtained from external sources and limited number of  
26  
27  
28 61 patients.  
29  
30  
31 • 62 Inherent limitations of MTM and IPD-MA for data interpretation / findings  
32  
33  
34 63 might be speculative  
35

36  
37 64

38  
39  
40 65

41  
42  
43 66

44  
45  
46 67

47  
48  
49 68

50  
51  
52 69

53  
54  
55 70

1  
2  
3  
4  
5  
6 **71 Background**

7  
8  
9 72 Gliomas are among the most commonly diagnosed primary brain tumors with an  
10  
11 73 estimated annual incidence of over 20,000 in the United States (SEER projection for  
12  
13  
14 74 2017). Based on clinical, histological and molecular characteristics, gliomas can be  
15  
16  
17 75 broadly divided into two major clinical subcategories: low-grade and high-grade.  
18  
19  
20 76 High-grade gliomas (also called malignant gliomas) are rapidly growing tumors and  
21  
22  
23 77 include glioblastomas (grade IV), anaplastic astrocytomas (grade III), mixed anaplastic  
24  
25  
26 78 oligoastrocytomas (grade III), and anaplastic oligodendrogliomas (grade III). Despite  
27  
28  
29 79 recent advances in multimodality therapies including temozolomide, high-grade gliomas  
30  
31  
32 80 remain incurable with a median survival of less than 3 years for glioblastomas and less  
33  
34  
35 81 than 5 years for anaplastic gliomas (NCCN & ESMO Clinical Practice Guidelines).  
36  
37  
38 82 In contrast, the low-grade gliomas include astrocytomas (grade II), oligodendrogliomas  
39  
40  
41 83 (grade II), and oligoastrocytomas (grade II), and are indolent, with a median survival  
42  
43  
44 84 over 5 years[1]. Treatment of low grade gliomas is evolving and includes maximal  
45  
46  
47 85 tumor resection with the option of radiation and chemotherapy[2].  
48  
49  
50 86 From the above it is evident that accurate pre-therapy histological grading is of  
51  
52  
53 87 paramount importance. In the usual clinical setting, histology is clarified with  
54  
55  
56 88 conventional computed tomography (CT) or magnetic resonance imaging (MRI),  
57  
58  
59  
60

1  
2  
3  
4  
5  
6 89 image-guided biopsy /subtotal surgical resection or near total resection. Unfortunately,  
7  
8  
9 90 apart from complete resection, other approaches are error-prone: Imaging does not  
10  
11 91 provide usable tissue for final diagnosis. Biopsies and partial resections can misguide,  
12  
13  
14 92 as gliomas can demonstrate histological heterogeneity due to histopathological  
15  
16  
17 93 progression; a tumor often has both low- and high-grade components. Unless total  
18  
19  
20 94 surgical resection is performed, histological results depend on which part of the tumor is  
21  
22  
23 95 sampled.

24  
25 96 As much as it is desirable, extensive tumor resection is not always feasible in  
26  
27  
28 97 frail patients or those with tumors located adjacent to critical structures. Therefore, in  
29  
30  
31 98 order to improve tumor grading either noninvasively, or by better, targeted biopsies, one  
32  
33  
34 99 needs to be able to supplement morphological information obtained from conventional  
35  
36  
37 100 imaging with tumor-specific functional information.

38  
39 101 PET is a useful imaging modality that provides additional metabolic  
40  
41  
42 102 information to CT- or MRI-based morphologic characterization of tumors. Its usefulness  
43  
44  
45 103 has been proven in lung cancer[3] and aggressive lymphomas[4]. Several studies have  
46  
47  
48 104 evaluated PET using various tracers such as 18F-FDG, 11C-MET, 18F-FET, and  
49  
50  
51 105 18F-FLT for pre-therapy histological prediction to differentiate high-grade from  
52  
53  
54 106 low-grade glioma, and reported promising results[5-7]. The sample sizes of these

1  
2  
3  
4  
5  
6 107 studies, however, are typically small, resulting in imprecise estimates of diagnostic  
7  
8  
9 108 accuracy and use heterogeneous designs / protocols for PET assessment, making  
10  
11  
12 109 interpretation of the published data difficult. Often, the positivity cutoff criteria are  
13  
14  
15 110 defined *post-hoc* to calculate the best pairs of sensitivity and specificity for each study  
16  
17  
18 111 and lack generalizability. In this situation, aggregate-level data meta-analysis  
19  
20 112 (ALD-MA) typically calculates overestimated summary statistics.  
21  
22  
23 113 A useful approach to the above problem to perform a meta-analysis based on  
24  
25  
26 114 individual-level data (Individual-level data meta-analysis; ILD-MA). This technique  
27  
28  
29 115 employs a predefined uniform cutoff value to estimate test performance measures for all  
30  
31  
32 116 included studies and combines their results. IPD-LD can also evaluate the effect of  
33  
34  
35 117 specific factors on test performance at the level of individual, simultaneously  
36  
37  
38 118 accounting for between-study variations. We therefore planned an ILD-MA to provide a  
39  
40  
41 119 comprehensive overview and quantitative synthesis of information on the test  
42  
43  
44 120 performance of PET for this purpose.  
45  
46  
47

121

## 122 **Methods**

123 This meta-analysis is an extension of a part of a series of systematic reviews on PET in  
124 clinical management of patients with glioma[8][9]. Although these reviews share a

1  
2  
3  
4  
5  
6 125 common literature search until June 2011, each project employs an independent  
7  
8 126 prespecified research protocol with standard systematic review methodologies, and  
9  
10  
11 127 assesses mutually exclusive research objectives. Interim results of an earlier related  
12  
13  
14 128 study of this research project have been presented at an international meeting[10] but  
15  
16  
17 129 never published as full-text.  
18  
19

20 130

### 21 22 131 *Literature search*

23  
24  
25 132 We will use our literature database of publications on PET assessed for patients with  
26  
27  
28 133 glioma. We established the database based on the searches of PubMed and Scopus from  
29  
30  
31 134 inception through June 30, 2011 with no language restriction and full-text evaluation of  
32  
33  
34 135 potentially relevant articles found through abstract screening. The complete search  
35  
36  
37 136 strategy and full list of the database is reported elsewhere[9] and also available as a  
38  
39  
40 137 supplementary file. We will update the searches until July 30, 2017, and examine the  
41  
42  
43 138 reference lists of eligible studies and relevant review articles.

44  
45 139 One reviewer (TN or NAT) will screen abstracts and at least two of three investigators  
46  
47  
48 140 (TT, NAT, and TT) examine full-text articles of potentially eligible citations.  
49  
50  
51 141 Discrepancies will be resolved by consensus.

### 52 53 142 *Inclusion and exclusion criteria*

1  
2  
3  
4  
5  
6 143 We will select studies that assess PET using 18F-FDG, 11C-MET, 18F-FET, or 18F-FLT  
7  
8  
9 144 for predicting glioma grading, verified with histologic confirmation by surgery or  
10  
11 145 biopsy to be eligible. We have selected these four particular tracers before conducting  
12  
13  
14 146 this research on the basis of an empirical evaluation of published studies of PET on  
15  
16  
17 147 glioma[9] and recently published narrative reviews[11][12]. We will include both  
18  
19  
20 148 prospective and retrospective studies. We will define pathologic confirmation (either by  
21  
22  
23 149 biopsy or surgical resection) as the acceptable reference standard and explicitly exclude  
24  
25  
26 150 studies (or individual patients in a study), in which (or for whom, respectively),  
27  
28  
29 151 pathological confirmation is not performed. We will consider the total surgical resection  
30  
31 152 as the (nearly) perfect reference standard, whereas, (stereotactic) biopsy will be deemed  
32  
33  
34 153 to be the imperfect reference standard. We will include any language publications that  
35  
36  
37 154 evaluated at least 10 patients for whom PET scanning and histopathological  
38  
39  
40 155 confirmation is successfully performed. We will exclude editorials, comments, letters to  
41  
42  
43 156 the editor, and review articles. When multiple publications with potentially overlapping  
44  
45  
46 157 patient populations are available, we will only include the publication with the largest  
47  
48  
49 158 sample size.

50  
51 159 We will contact study authors by email if studies do not report adequate  
52  
53  
54 160 information on PET and histological results in the participant-level, or if IPD data are  
55  
56  
57  
58  
59  
60



1  
2  
3  
4  
5  
6 161 not presented in the paper. We will consider our request to be rejected if two email  
7  
8  
9 162 request reminders separately sent q 14 days after the initial contact attempt are rejected.  
10  
11 163 Even in this case, we will allow for the inclusion of a study report in which quantitative  
12  
13  
14 164 data is not reported but the digital extraction (i.e., data extraction by using a digitizer  
15  
16  
17 165 from its published graphical presentations) is feasible. Otherwise we will exclude these  
18  
19  
20 166 studies. Data will be kept in a shared secure folder accessible by all co-authors.

21  
22  
23 167 ***Data extraction***

24  
25 168 One reviewer (TN or NAT) will extract descriptive data from each eligible study.  
26  
27  
28 169 Another one non-overlapping investigator (TN, NAT, or TT) will verify all the extracted  
29  
30  
31 170 data. We will extract the following published descriptive information from eligible  
32  
33  
34 171 studies: first author, year of publication, journal, patient demographics and clinical  
35  
36  
37 172 characteristics, therapeutic interventions in the case of post-therapy or recurrence  
38  
39  
40 173 assessment, technical specifications of PET, and interpretation of PET results.  
41  
42  
43 174 One reviewer (TN, or NAT) will extract published quantitative data regarding imaging  
44  
45  
46 175 results (i.e., visual assessment and quantitative assessment such as standard uptake  
47  
48  
49 176 values (SUVs) or tumor-to-normal uptake ratio (T/N ratio)) and final diagnoses (i.e.,  
50  
51  
52 177 histopathologic subtype and grading) at the individual level. Another one reviewer (TT)  
53  
54  
55 178 will verify all the data. We will exclude any cases in which PET scanning is  
56  
57  
58  
59  
60

1  
2  
3  
4  
5  
6 179 unsuccessful (and thus results are arbitrary imputed *post-hoc*). We will also exclude any  
7  
8  
9 180 cases in which alternative reference standards such as clinical follow-up instead of  
10  
11 181 pathological confirmation is used to determine histologic grading.

12  
13  
14 182 If reported, we will also extract the following individual-level variables as the candidate  
15  
16  
17 183 effect-modifiers to be evaluated in meta-regression: age, sex, clinical scenario (i.e.,  
18  
19  
20 184 primary diagnosis vs. post-therapy/recurrence assessment), and tissue sampling methods  
21  
22  
23 185 (i.e, how the pathological specimens are obtained, either biopsy, partial or total  
24  
25  
26 186 resection)

27  
28  
29 187

30  
31 188 ***Assessment of risk of bias.***

32  
33  
34 189 To assess the risk of bias and applicability of each study, two reviewers (TN, NAT) will  
35  
36  
37 190 independently assess patient selection, index test, reference standard, and their flow and  
38  
39  
40 191 timing based on the revised Quality Assessment of Diagnostic Accuracy Studies  
41  
42  
43 192 (QUADAS-2). Methods to detect publication bias are not very reliable when used in  
44  
45  
46 193 diagnostic accuracy data, especially in case of heterogeneity, but we will use the method  
47  
48  
49 194 of Deeks et al[13] that has been shown to be the least biased. Discrepant ratings will be  
50  
51  
52 195 resolved by consensus. The complete list of operational definitions to rate each item is  
53  
54  
55 196 available from the authors upon request.

1  
2  
3  
4  
5  
6 197

7  
8  
9 198 ***Data synthesis***

10  
11 199 We will use a bivariate model to obtain an estimate of the summary sensitivity and  
12  
13  
14 200 specificity with their corresponding confidence intervals (CIs). We will fit a two-level a  
15  
16  
17 201 generalized mixed regression model conditional on the sensitivity and specificity of  
18  
19  
20 202 each study and a bivariate normal model for the sensitivity and specificity between  
21  
22  
23 203 studies [14](Reitsma et al, 2005 Journal of Clinical Epidemiology; Chu H and Cole SR,  
24  
25  
26 204 2006, Journal of Clinical Epidemiology). We will calculate summary positive and  
27  
28  
29 205 negative likelihood ratios based on the summary sensitivity and specificity estimates.  
30  
31 206 Positive likelihood ratio (LR+) is the ratio of sensitivity over (1-specificity) whereas  
32  
33  
34 207 negative likelihood ratio (LR-) is defined as the ratio of (1-sensitivity) over specificity.  
35  
36  
37 208 The discriminating ability of a diagnostic test is better with higher LR+ and lower LR-.  
38  
39  
40 209 A good diagnostic test typically has LR+ >5.0 and LR- <0.2. We will also construct a  
41  
42  
43 210 hierarchical summary receiver operating characteristic curve (HSROC) based on the  
44  
45  
46 211 parameters of the fitted model (Rutter Cm and Gatsonis CA, 2001; Statistics in  
47  
48  
49 212 Medicine; Macaskill P, 2004; Journal of Clinical Epidemiology). We will assess  
50  
51  
52 213 between-study heterogeneity visually using forest plots, and also by plotting sensitivity  
53  
54  
55 214 and specificity in the ROC space. We will construct 95% credible regions for summary  
56  
57  
58  
59  
60

1  
2  
3  
4  
5  
6 215 sensitivity and specificity from the estimated parameters as proposed[15].  
7  
8

9 216  
10

11 217 ***Subgroup analysis and meta-regression***  
12  
13

14 218 To explore heterogeneity, we will perform subgroup analyses and if feasible, the  
15

16  
17 219 statistical differences among mutually exclusive subgroups will be assessed by  
18

19  
20 220 univariable meta-regression. We will add a candidate modifier (as either 0 [absence] or  
21

22  
23 221 1 [presence]) to the test performance parameters (i.e., sensitivity and specificity  
24

25  
26 222 parameters, or diagnostic odds ratio and threshold parameters, respectively) jointly in  
27

28  
29 223 the bivariate random-effects model or binormal random-effects model, respectively.  
30

31 224 We will record: publication year, study design (i.e., prospective versus retrospective) as  
32

33  
34 225 the study-level covariates, age, sex, clinical scenario (i.e., primary diagnosis vs.  
35

36  
37 226 post-therapy/recurrence assessment) and tissue sampling methods (i.e., biopsy vs.  
38

39  
40 227 partial or subtotal resection vs. total resection).  
41

42  
43 228  
44

45 229 ***Comparisons among different PET methodologies***  
46  
47

48 230 We will compare the test performance among alternative PET tracers, and also those  
49

50  
51 231 based on different imaging assessment protocols (i.e., visual assessment vs. quantitative  
52

53  
54 232 assessment, either T/N ratios or SUVs). Regarding the T/N ratios, we will operationally  
55  
56  
57  
58  
59  
60

1  
2  
3  
4  
5  
6 233 define three categories based on the specified referent tissues: mean or median uptakes  
7  
8  
9 234 in the gray matter (GM), those in the white matter (WM), and other miscellaneous  
10  
11  
12 235 methods (MISC) including mean or median uptakes in the contra-lateral corresponding  
13  
14  
15 236 anatomical sites or those in the adjacent normal tissue regardless of GM or WM.

16  
17 237 For indirect comparisons, we will visually compare the constructed summary  
18  
19  
20 238 ROC curves and the credible regions of sensitivity and specificity. We will also  
21  
22  
23 239 statistically assess the differences by univariable meta-regression using the tracers or  
24  
25  
26 240 assessment methods as the covariate being incorporated into the meta-analytic model.  
27  
28  
29 241 These results however, need to be interpreted carefully because findings from the  
30  
31  
32 242 indirect comparisons may be only speculative[16]. To tackle this issue, we will also  
33  
34  
35 243 perform these analyses limiting only to comparative studies that assess multiple tracers  
36  
37  
38 244 or methods for the same participants, from which direct comparisons can be performed.

39  
40 245 We will conduct all analyses using STATA, version 14/SE (Stata Corp, College  
41  
42  
43 246 Station, TX), and OpenBUGS, version 3.2.3 (members of OpenBUGS Project  
44  
45  
46 247 Management Group; see [www.openbugs.net](http://www.openbugs.net)). All tests will be two-sided and statistical  
47  
48  
49 248 significance will be defined as a  $p$ -value  $< .05$ .

## 50 51 249 **Discussion**

52  
53  
54 250 Differentiating high from low grade malignancies has significant prognostic  
55  
56  
57  
58  
59  
60

1  
2  
3  
4  
5  
6 251 information for a variety of tumors; gliomas are not an exception. While an optimally  
7  
8  
9 252 resected biopsy specimen is always preferable to indirect evidence, imaging can provide  
10  
11  
12 253 helpful adjunct information. Moreover, functional imaging, such as positron emission  
13  
14  
15 254 tomography with select biotracers has the potential to become a powerful tool in  
16  
17  
18 255 assessment of patients and influence treatment decisions. By conducting a multiple  
19  
20  
21 256 treatment meta- analysis and IPD meta-analysis, this study hopes to clarify the  
22  
23  
24 257 diagnostic accuracy of PET/CT with various tracers in differentiating glioma histology  
25  
26  
27 258 and establish thresholds, upon which further studies can be performed.

28  
29 259 **Contributorship statement:** Abstract screening: TN and NAT. Full-text article  
30  
31  
32 260 examination: TT, NAT, and TT. Data extraction: TN, TT and NAT. Assessment of the  
33  
34  
35 261 risk of bias and applicability of each study: TN and NAT. Statistical analysis: TT and  
36  
37  
38 262 EE. All authors (TN,TT,EE,NAT) have equally contributed to the final version of the  
39  
40  
41 263 protocol, have reviewed and have approved of it.

42  
43 264 **Competing interests:** None declared.

44  
45  
46 265 **Funding:** This research received no specific grant from any funding agency in the  
47  
48  
49 266 public, commercial or not-for-profit sectors.

50  
51  
52 267 **Data sharing statement:** Supplementary and raw data can be provided by the authors  
53  
54  
55 268 freely upon request.

269 **Provenance and peer review:** Not commissioned; externally peer reviewed.

270

271

272

273 **References:**

- 274 1. Claus EB, Walsh KM, Wiencke JK, Molinaro AM, Wiemels JL, Schildkraut JM,  
275 Bondy ML, Berger M, Jenkins R, Wrensch M: **Survival and low-grade glioma: the**  
276 **emergence of genetic information.** *Neurosurg Focus* 2015, **38**(1):E6.
- 277 2. Buckner JC, Shaw EG, Pugh SL, Chakravarti A, Gilbert MR, Barger GR, Coons S,  
278 Ricci P, Bullard D, Brown PD *et al*: **Radiation plus Procarbazine, CCNU, and**  
279 **Vincristine in Low-Grade Glioma.** *N Engl J Med* 2016, **374**(14):1344-1355.
- 280 3. Sheikhabahaei S, Mena E, Yanamadala A, Reddy S, Solnes LB, Wachsmann J,  
281 Subramaniam RM: **The Value of FDG PET/CT in Treatment Response Assessment,**  
282 **Follow-Up, and Surveillance of Lung Cancer.** *AJR Am J Roentgenol* 2017,  
283 **208**(2):420-433.
- 284 4. Adams HJ, Kwee TC: **Pretransplant FDG-PET in aggressive non-Hodgkin**  
285 **lymphoma: systematic review and meta-analysis.** *Eur J Haematol* 2017,  
286 **98**(4):337-347.
- 287 5. Miyake K, Shinomiya A, Okada M, Hatakeyama T, Kawai N, Tamiya T: **Usefulness**  
288 **of FDG, MET and FLT-PET studies for the management of human gliomas.** *J*  
289 *Biomed Biotechnol* 2012, **2012**:205818.
- 290 6. Sweeney R, Polat B, Samnick S, Reiners C, Flentje M, Verburg FA:  
291 **O-(2-[(18F)fluoroethyl]-L-tyrosine uptake is an independent prognostic**  
292 **determinant in patients with glioma referred for radiation therapy.** *Ann Nucl Med*  
293 2014, **28**(2):154-162.
- 294 7. Thon N, Kunz M, Lemke L, Jansen NL, Eigenbrod S, Kreth S, Lutz J, Egensperger R,  
295 Giese A, Herms J *et al*: **Dynamic 18F-FET PET in suspected WHO grade II gliomas**  
296 **defines distinct biological subgroups with different clinical courses.** *Int J Cancer*  
297 2015, **136**(9):2132-2145.
- 298 8. Nishashi T, Dahabreh IJ, Terasawa T: **Diagnostic accuracy of PET for recurrent**  
299 **glioma diagnosis: a meta-analysis.** *AJNR Am J Neuroradiol* 2013, **34**(5):944-950,

- 1  
2  
3  
4  
5 300 S941-911.  
6 301 9. Nihashi T, Dahabreh IJ, Terasawa T: **PET in the clinical management of glioma:  
7 302 evidence map.** *AJR Am J Roentgenol* 2013, **200**(6):W654-660.  
8 303 10. Nihashi T DI, Terasawa T: **Positron Emission Tomography (PET) to Differentiate  
9 304 High-Grade from Low-Grade Glioma: A Meta-Analysis of Test Performance.** *J  
10 305 Neuroimaging* 2014, **23**(2):280 (Abstract)  
11 306 .  
12 307 11. la Fougere C, Suchorska B, Bartenstein P, Kreth FW, Tonn JC: **Molecular imaging of  
13 308 gliomas with PET: opportunities and limitations.** *Neuro Oncol* 2011, **13**(8):806-819.  
14 309 12. Boellaard R: **Need for standardization of 18F-FDG PET/CT for treatment response  
15 310 assessments.** *J Nucl Med* 2011, **52** Suppl 2:93S-100S.  
16 311 13. Deeks JJ, Macaskill P, Irwig L: **The performance of tests of publication bias and  
17 312 other sample size effects in systematic reviews of diagnostic test accuracy was  
18 313 assessed.** *J Clin Epidemiol* 2005, **58**(9):882-893.  
19 314 14. Riley RD, Dodd SR, Craig JV, Thompson JR, Williamson PR: **Meta-analysis of  
20 315 diagnostic test studies using individual patient data and aggregate data.** *Stat Med*  
21 316 2008, **27**(29):6111-6136.  
22 317 15. Harbord RM, Deeks JJ, Egger M, Whiting P, Sterne JA: **A unification of models for  
23 318 meta-analysis of diagnostic accuracy studies.** *Biostatistics* 2007, **8**(2):239-251.  
24 319 16. Takwoingi Y, Leeflang MM, Deeks JJ: **Empirical evidence of the importance of  
25 320 comparative studies of diagnostic test accuracy.** *Ann Intern Med* 2013,  
26 321 **158**(7):544-554.  
27 322  
28  
29  
30  
31  
32  
33  
34  
35  
36  
37  
38  
39  
40  
41  
42  
43  
44  
45  
46  
47  
48  
49  
50  
51  
52  
53  
54  
55  
56  
57  
58  
59  
60



## Literature search strategies

### *PubMed*

((("Brain Neoplasms"[Mesh] OR "Glioma"[Mesh] OR glioma\* OR (glioblastoma\* OR "glioblastoma multiforme") OR (astrocytoma\* OR "anaplastic astrocytoma") OR (oligodendrocytoma\* OR "anaplastic oligodendrocytoma") OR (brain AND (tumor\* OR tumour\*)) OR (neuroectodermal AND (tumor\* OR tumour\*)) OR ependymoma\* OR oligodendroglioma\*)) AND ("Tomography, Emission-Computed"[Mesh] OR (positron AND emission AND tomograph\*) OR pet) AND "humans"[MeSH Terms])

### *SCOPUS*

(TITLE-ABS-KEY(glioma\*) OR TITLE-ABS-KEY(glioblastoma\*) OR TITLE-ABS-KEY(glioblastoma PRE/0 multiforme) OR TITLE-ABS-KEY(astrocytoma\*) OR TITLE-ABS-KEY(anaplastic PRE/0 astrocytoma) OR TITLE-ABS-KEY(oligodendrocytoma\*) OR TITLE-ABS-KEY(anaplastic PRE/0 oligodendrocytoma) OR TITLE-ABS-KEY(brain tumo\*r\*) OR TITLE-ABS-KEY(neuroectodermal PRE/0 tumo\*r\*) OR TITLE-ABS-KEY(ependymoma\*) OR TITLE-ABS-KEY(oligodendroglioma\*)) AND (TITLE-ABS-KEY(positron PRE/0 emission PRE/0 tomograph\*) OR TITLE-ABS-KEY(pet))

1  
2  
3  
4  
5  
6  
7  
8  
9  
10  
11  
12  
13  
14  
15  
16  
17  
18  
19  
20  
21  
22  
23  
24  
25  
26  
27  
28  
29  
30  
31  
32  
33  
34  
35  
36  
37  
38  
39  
40  
41  
42  
43  
44  
45  
46  
47

**PRISMA-P (Preferred Reporting Items for Systematic review and Meta-Analysis Protocols) 2015 checklist: recommended items to address in a systematic review protocol\***

| Section and topic                 | Item No          | Checklist item                                                                                                                                                                                                                |
|-----------------------------------|------------------|-------------------------------------------------------------------------------------------------------------------------------------------------------------------------------------------------------------------------------|
| <b>ADMINISTRATIVE INFORMATION</b> |                  |                                                                                                                                                                                                                               |
| Title:                            |                  |                                                                                                                                                                                                                               |
| Identification                    | 1a Line 1        | Identify the report as a protocol of a systematic review.                                                                                                                                                                     |
| Update                            | 1b Line 131      | If the protocol is for an update of a previous systematic review, identify as such                                                                                                                                            |
| Registration                      | 2 Line 49        | If registered, provide the name of the registry (such as PROSPERO) and registration number                                                                                                                                    |
| Authors:                          |                  |                                                                                                                                                                                                                               |
| Contact                           | 3a Line 23       | Provide name, institutional affiliation, e-mail address of all protocol authors; provide physical mailing address of corresponding author                                                                                     |
| Contributions                     | 3b Line 259      | Describe contributions of protocol authors and identify the guarantor of the review                                                                                                                                           |
| Amendments                        | 4 Not applicable | If the protocol represents an amendment of a previously completed or published protocol, identify as such and list changes; otherwise, state plan for documenting important protocol amendments                               |
| Support:                          |                  |                                                                                                                                                                                                                               |
| Sources                           | 5a Line 265      | Indicate sources of financial or other support for the review                                                                                                                                                                 |
| Sponsor                           | 5b N/A           | Provide name for the review funder and/or sponsor                                                                                                                                                                             |
| Role of sponsor or funder         | 5c N/A           | Describe roles of funder(s), sponsor(s), and/or institution(s), if any, in developing the protocol                                                                                                                            |
| <b>INTRODUCTION</b>               |                  |                                                                                                                                                                                                                               |
| Rationale                         | 6 Line 72        | Describe the rationale for the review in the context of what is already known                                                                                                                                                 |
| Objectives                        | 7 Line 118       | Provide an explicit statement of the question(s) the review will address with reference to participants, interventions, comparators, and outcomes (PICO)                                                                      |
| <b>METHODS</b>                    |                  |                                                                                                                                                                                                                               |
| Eligibility criteria              | 8 Line 132       | Specify the study characteristics (such as PICO, study design, setting, time frame) and report characteristics (such as years considered, language, publication status) to be used as criteria for eligibility for the review |
| Information sources               | 9 Line 133       | Describe all intended information sources (such as electronic databases, contact with study authors, trial registers or other grey literature sources) with planned dates of coverage                                         |
| Search strategy                   | 10 Line 137      | Present draft of search strategy to be used for at least one electronic database, including planned limits, such that it could be repeated                                                                                    |
| Study records:                    |                  |                                                                                                                                                                                                                               |

|                                    |              |                                                                                                                                                                                                                                                  |
|------------------------------------|--------------|--------------------------------------------------------------------------------------------------------------------------------------------------------------------------------------------------------------------------------------------------|
| Data management                    | 11a Line 168 | Describe the mechanism(s) that will be used to manage records and data throughout the review                                                                                                                                                     |
| Selection process                  | 11b Line 143 | State the process that will be used for selecting studies (such as two independent reviewers) through each phase of the review (that is, screening, eligibility and inclusion in meta-analysis)                                                  |
| Data collection process            | 11c Line 168 | Describe planned method of extracting data from reports (such as piloting forms, done independently, in duplicate), any processes for obtaining and confirming data from investigators                                                           |
| Data items                         | 12 Line 171  | List and define all variables for which data will be sought (such as PICO items, funding sources), any pre-planned data assumptions and simplifications                                                                                          |
| Outcomes and prioritization        | 13 Line 174  | List and define all outcomes for which data will be sought, including prioritization of main and additional outcomes, with rationale                                                                                                             |
| Risk of bias in individual studies | 14 Line 189  | Describe anticipated methods for assessing risk of bias of individual studies, including whether this will be done at the outcome or study level, or both; state how this information will be used in data synthesis                             |
| Data synthesis                     | 15a Line 199 | Describe criteria under which study data will be quantitatively synthesised                                                                                                                                                                      |
|                                    | 15b Line 204 | If data are appropriate for quantitative synthesis, describe planned summary measures, methods of handling data and methods of combining data from studies, including any planned exploration of consistency (such as $I^2$ , Kendall's $\tau$ ) |
|                                    | 15c Line 218 | Describe any proposed additional analyses (such as sensitivity or subgroup analyses, meta-regression)                                                                                                                                            |
|                                    | 15d N/A      | If quantitative synthesis is not appropriate, describe the type of summary planned                                                                                                                                                               |
| Meta-bias(es)                      | 16 Line 194  | Specify any planned assessment of meta-bias(es) (such as publication bias across studies, selective reporting within studies)                                                                                                                    |
| Confidence in cumulative evidence  | 17 Line 218  | Describe how the strength of the body of evidence will be assessed (such as GRADE)                                                                                                                                                               |

**\* It is strongly recommended that this checklist be read in conjunction with the PRISMA-P Explanation and Elaboration (cite when available) for important clarification on the items. Amendments to a review protocol should be tracked and dated. The copyright for PRISMA-P (including checklist) is held by the PRISMA-P Group and is distributed under a Creative Commons Attribution Licence 4.0.**

*From: Shamseer L, Moher D, Clarke M, Ghersi D, Liberati A, Petticrew M, Shekelle P, Stewart L, PRISMA-P Group. Preferred reporting items for systematic review and meta-analysis protocols (PRISMA-P) 2015: elaboration and explanation. BMJ. 2015 Jan 2;349(jan02 1):g7647.*
