# Supplementary material for: Positron emission tomography (PET) for prediction of glioma histology: protocol for an individual-level data meta-analysis of test performance
Source: PubMed Central journal article supplement — BMJ Open. 2018 Feb 17;8(2):e020187. doi: 10.1136/bmjopen-2017-020187 (PMC5855451; doi:10.1136/bmjopen-2017-020187), 2018-02-17
Supplement: bmjopen-2017-020187supp001.pdf [file bmjopen-2017-020187supp001.pdf]

## **Literature search strategies**

### ***PubMed***

((("Brain Neoplasms"[Mesh] OR "Glioma"[Mesh] OR glioma\* OR (glioblastoma\* OR "glioblastoma multiforme") OR (astrocytoma\* OR "anaplastic astrocytoma") OR (oligodendrocytoma\* OR "anaplastic oligodendrocytoma") OR (brain AND (tumor\* OR tumour\*)) OR (neuroectodermal AND (tumor\* OR tumour\*)) OR ependymoma\* OR oligodendroglioma\*)) AND ("Tomography, Emission-Computed"[Mesh] OR (positron AND emission AND tomograph\*) OR pet) AND "humans"[MeSH Terms])

### ***SCOPUS***

(TITLE-ABS-KEY(glioma\*) OR TITLE-ABS-KEY(glioblastoma\*) OR TITLE-ABS-KEY(glioblastoma PRE/0 multiforme) OR TITLE-ABS-KEY(astrocytoma\*) OR TITLE-ABS-KEY(anaplastic PRE/0 astrocytoma) OR TITLE-ABS-KEY(oligodendrocytoma\*) OR TITLE-ABS-KEY(anaplastic PRE/0 oligodendrocytoma) OR TITLE-ABS-KEY(brain tumo\*r\*) OR TITLE-ABS-KEY(neuroectodermal PRE/0 tumo\*r\*) OR TITLE-ABS-KEY(ependymoma\*) OR TITLE-ABS-KEY(oligodendroglioma\*)) AND (TITLE-ABS-KEY(positron PRE/0 emission PRE/0 tomograph\*) OR TITLE-ABS-KEY(pet))
